# Supplementary material for: Luminescence Enhancement and Temperature Sensing Properties of Hybrid Bismuth Halides Achieved via Tuning Organic Cations
Source: MDPI journal article supplement (doi:10.3390/molecules28052380), 2023-03-04
Supplement: s1 [file s1]

# Supporting Information

## Luminescence Enhancement and Temperature Sensing Properties of Hybrid Bismuth Halides Achieved via Tuning Organic Cations

Ting-Hui Zhuang <sup>1,2</sup>, Yi-Min Lin <sup>1,2</sup>, Hao-Wei Lin <sup>2,3</sup>, Yan-Ling Guo <sup>1,2</sup>, Zi-Wei Li <sup>1,2</sup>, Ke-Zhao Du <sup>1,\*</sup>, Ze-Ping Wang <sup>2,\*</sup> and Xiao-Ying Huang <sup>2,\*</sup>

<sup>1</sup> Fujian Provincial Key Laboratory of Advanced Materials Oriented Chemical Engineering, College of Chemistry and Materials Science, Fujian Normal University, Fuzhou 350007, China

<sup>2</sup> State Key Laboratory of Structural Chemistry, Fujian Institute of Research on the Structure of Matter, Chinese Academy of Sciences, Fuzhou 350002, China

<sup>3</sup> College of Chemistry, Fuzhou University, Fuzhou 350116, China

\* Correspondence: dkz007002@163.com (K.-Z.D.); wzping@fjirsm.ac.cn (Z.-P.W.); xyhuang@fjirsm.ac.cn (X.-Y.H.); Tel.: +0591-63173145 (X.-Y.H.)

**Table S1.** Crystallographic data and refinement details for **1**, and **2**.

| Compound                                                                      | <b>1</b>                                                         | <b>2</b>                                                                              |
|-------------------------------------------------------------------------------|------------------------------------------------------------------|---------------------------------------------------------------------------------------|
| Empirical formula                                                             | C <sub>21</sub> H <sub>22</sub> BiCl <sub>4</sub> N <sub>3</sub> | C <sub>22</sub> H <sub>30.50</sub> BiCl <sub>4</sub> N <sub>3</sub> O <sub>0.25</sub> |
| Formula Mass                                                                  | 667.19                                                           | 691.77                                                                                |
| Crystal system                                                                | monoclinic                                                       | monoclinic                                                                            |
| Space group                                                                   | <i>P</i> 2 <sub>1</sub> / <i>c</i>                               | <i>P</i> 2 <sub>1</sub>                                                               |
| <i>a</i> /Å                                                                   | 10.1667(7)                                                       | 11.3962(9)                                                                            |
| <i>b</i> /Å                                                                   | 15.5703(7)                                                       | 18.0531(15)                                                                           |
| <i>c</i> /Å                                                                   | 15.1177(8)                                                       | 12.2968(8)                                                                            |
| $\alpha$ /°                                                                   | 90                                                               | 90                                                                                    |
| $\beta$ /°                                                                    | 105.882(7)                                                       | 91.253(7)                                                                             |
| $\gamma$ /°                                                                   | 90                                                               | 90                                                                                    |
| <i>V</i> /Å <sup>3</sup>                                                      | 2301.8(2)                                                        | 2529.3(3)                                                                             |
| <i>Z</i>                                                                      | 4                                                                | 4                                                                                     |
| <i>T</i> /K                                                                   | 100(2)                                                           | 100(2)                                                                                |
| $\lambda$ /Å                                                                  | 0.71073                                                          | 0.71073                                                                               |
| <i>F</i> (000)                                                                | 1280                                                             | 1346                                                                                  |
| $\rho_{\text{calcd}}$ /g cm <sup>-3</sup>                                     | 1.925                                                            | 1.817                                                                                 |
| $\mu$ /mm <sup>-1</sup>                                                       | 8.137                                                            | 7.409                                                                                 |
| Measured refls.                                                               | 26752                                                            | 25656                                                                                 |
| Independent refls.                                                            | 5751                                                             | 8866                                                                                  |
| No. of parameters                                                             | 356                                                              | 555                                                                                   |
| <i>R</i> <sub>int</sub>                                                       | 0.0845                                                           | 0.0763                                                                                |
| <i>R</i> <sub>1</sub> ( <i>I</i> > 2σ( <i>I</i> )) <sup>a</sup>               | 0.0361                                                           | 0.0416                                                                                |
| <i>wR</i> ( <i>F</i> <sup>2</sup> ) ( <i>I</i> > 2σ( <i>I</i> )) <sup>b</sup> | 0.0684                                                           | 0.0690                                                                                |
| <i>GOF</i>                                                                    | 1.061                                                            | 1.014                                                                                 |

$$^a R_1 = \sum \|F_o| - |F_c|\| / \sum |F_o|, ^b wR_2 = [\sum w(F_o^2 - F_c^2)^2 / \sum w(F_o^2)^2]^{1/2}.$$

**Table S2.** Selected bond lengths (Å) and bond angles (°) for **1**.

| Selected bond lengths (Å) |            |                   |            |
|---------------------------|------------|-------------------|------------|
| Bi(1)-N(1)                | 2.501(4)   | Bi(1)-Cl(4)       | 2.7148(15) |
| Bi(1)-N(2)                | 2.528(3)   | N(1)-C(1)         | 1.332(5)   |
| Bi(1)-Cl(3)               | 2.6488(12) | N(1)-C(12)        | 1.360(5)   |
| Bi(1)-Cl(2)               | 2.6536(12) | N(2)-C(10)        | 1.329(5)   |
| Bi(1)-Cl(1)               | 2.6725(14) | N(2)-C(11)        | 1.357(5)   |
| Selected bond angles (°)  |            |                   |            |
| N(1)-Bi(1)-N(2)           | 66.05(11)  | N(1)-Bi(1)-Cl(4)  | 85.54(9)   |
| N(1)-Bi(1)-Cl(3)          | 160.23(8)  | N(2)-Bi(1)-Cl(4)  | 88.70(9)   |
| N(2)-Bi(1)-Cl(3)          | 94.19(8)   | Cl(3)-Bi(1)-Cl(4) | 93.84(4)   |
| N(1)-Bi(1)-Cl(2)          | 94.45(8)   | Cl(2)-Bi(1)-Cl(4) | 94.87(4)   |
| N(2)-Bi(1)-Cl(2)          | 159.90(8)  | Cl(1)-Bi(1)-Cl(4) | 168.54(4)  |
| Cl(3)-Bi(1)-Cl(2)         | 105.28(4)  | C(1)-N(1)-Bi(1)   | 122.4(3)   |
| N(1)-Bi(1)-Cl(1)          | 83.54(9)   | C(12)-N(1)-Bi(1)  | 118.7(3)   |

|                   |          |                  |          |
|-------------------|----------|------------------|----------|
| N(2)-Bi(1)-Cl(1)  | 83.71(9) | C(10)-N(2)-Bi(1) | 122.7(3) |
| Cl(3)-Bi(1)-Cl(1) | 95.26(5) | C(11)-N(2)-Bi(1) | 117.9(3) |
| Cl(2)-Bi(1)-Cl(1) | 89.44(4) |                  |          |

**Table S3.** Selected bond lengths (Å) and bond angles (°) for **2**.

| Selected bond lengths (Å) |            |                   |            |
|---------------------------|------------|-------------------|------------|
| Bi(1)-N(2)                | 2.431(12)  | Bi(2)-N(3)        | 2.469(12)  |
| Bi(1)-N(1)                | 2.467(12)  | Bi(2)-N(4)        | 2.498(12)  |
| Bi(1)-Cl(4)               | 2.609(4)   | Bi(2)-Cl(8)       | 2.649(3)   |
| Bi(1)-Cl(3)               | 2.650(4)   | Bi(2)-Cl(7)       | 2.653(4)   |
| Bi(1)-Cl(1)               | 2.716(3)   | Bi(2)-Cl(6)       | 2.686(4)   |
| Bi(1)-Cl(2)               | 2.746(4)   | Bi(2)-Cl(5)       | 2.698(3)   |
| N(1)-C(1)                 | 1.316(17)  | N(3)-C(13)        | 1.297(16)  |
| N(1)-C(12)                | 1.346(17)  | N(3)-C(24)        | 1.355(17)  |
| N(2)-C(10)                | 1.325(17)  | N(4)-C(22)        | 1.286(16)  |
| N(2)-C(11)                | 1.356(17)  | N(4)-C(23)        | 1.349(18)  |
| Selected bond angles (°)  |            |                   |            |
| N(2)-Bi(1)-Cl(1)          | 81.6(3)    | N(3)-Bi(2)-N(4)   | 67.2(4)    |
| N(1)-Bi(1)-Cl(1)          | 78.0(3)    | N(3)-Bi(2)-Cl(8)  | 86.6(3)    |
| Cl(4)-Bi(1)-Cl(1)         | 159.14(16) | N(4)-Bi(2)-Cl(8)  | 83.6(3)    |
| Cl(3)-Bi(1)-Cl(1)         | 96.31(11)  | N(3)-Bi(2)-Cl(7)  | 90.2(3)    |
| N(2)-Bi(1)-Cl(2)          | 161.2(3)   | N(4)-Bi(2)-Cl(7)  | 157.2(3)   |
| N(2)-Bi(1)-N(1)           | 67.8(4)    | Cl(8)-Bi(2)-Cl(7) | 99.18(11)  |
| N(2)-Bi(1)-Cl(4)          | 82.4(3)    | N(3)-Bi(2)-Cl(6)  | 160.3(3)   |
| N(1)-Bi(1)-Cl(4)          | 83.7(3)    | N(4)-Bi(2)-Cl(6)  | 94.7(3)    |
| N(2)-Bi(1)-Cl(3)          | 89.5(3)    | Cl(8)-Bi(2)-Cl(6) | 99.71(12)  |
| N(1)-Bi(1)-Cl(3)          | 157.1(3)   | Cl(7)-Bi(2)-Cl(6) | 107.02(14) |
| Cl(4)-Bi(1)-Cl(3)         | 96.79(12)  | N(3)-Bi(2)-Cl(5)  | 77.7(3)    |
| N(1)-Bi(1)-Cl(2)          | 93.4(3)    | N(4)-Bi(2)-Cl(5)  | 80.6(3)    |
| Cl(4)-Bi(1)-Cl(2)         | 96.26(12)  | Cl(8)-Bi(2)-Cl(5) | 161.04(16) |
| Cl(3)-Bi(1)-Cl(2)         | 109.23(13) | Cl(7)-Bi(2)-Cl(5) | 91.52(11)  |
| Cl(1)-Bi(1)-Cl(2)         | 94.66(12)  | Cl(6)-Bi(2)-Cl(5) | 91.97(13)  |
| C(1)-N(1)-Bi(1)           | 123.3(10)  | C(13)-N(3)-Bi(2)  | 124.2(10)  |
| C(12)-N(1)-Bi(1)          | 116.4(8)   | C(24)-N(3)-Bi(2)  | 117.4(9)   |
| C(10)-N(2)-Bi(1)          | 123.4(10)  | C(22)-N(4)-Bi(2)  | 123.2(10)  |
| C(11)-N(2)-Bi(1)          | 117.7(8)   | C(23)-N(4)-Bi(2)  | 116.3(8)   |

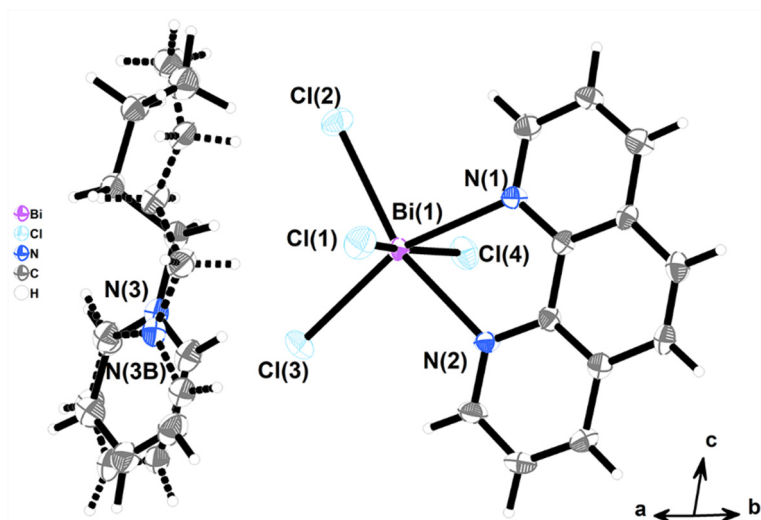

**Figure S1.** ORTEP drawing (50% ellipsoid probability) of the asymmetric unit of **1** at 100 K.

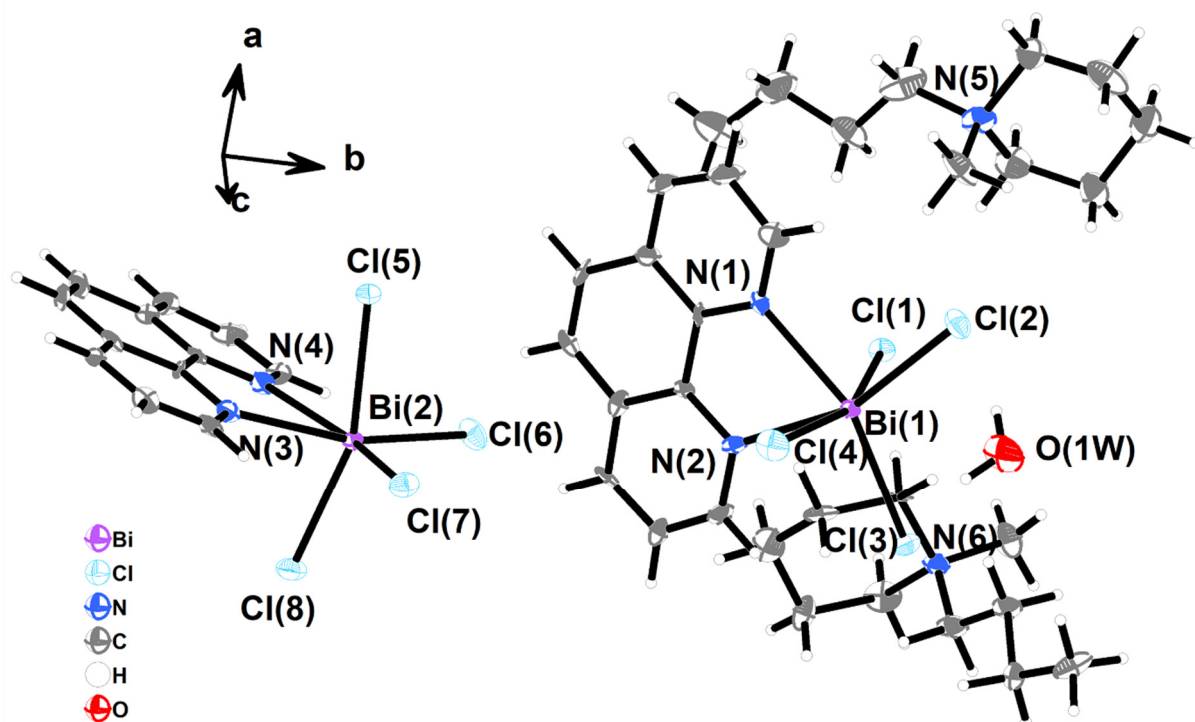

**Figure S2.** ORTEP drawing (50% ellipsoid probability) of the asymmetric unit of **2** at 100 K.

**Table S4.** Hydrogen bonding data for **1** at 100 K.

| D-H...A                                             | D-H (Å) | H...A (Å) | D...A (Å) | <(DHA) (°) |
|-----------------------------------------------------|---------|-----------|-----------|------------|
| C(1)-H(1A)···Cl(3)#1                                | 0.93    | 2.88      | 3.555(4)  | 130.2      |
| C(10)-H(10A)···Cl(2)#2                              | 0.93    | 2.99      | 3.466(4)  | 113.4      |
| C(14 <sup>a</sup> )-H(14A <sup>a</sup> )···Cl(2)#2  | 0.93    | 2.92      | 3.553(11) | 126.6      |
| C(16 <sup>a</sup> )-H(16A <sup>a</sup> )···Cl(1)#3  | 0.93    | 2.68      | 3.504(11) | 148.5      |
| C(17 <sup>a</sup> )-H(17A <sup>a</sup> )···Cl(2)#4  | 0.93    | 2.64      | 3.493(18) | 153.1      |
| C(18 <sup>a</sup> )-H(18B <sup>a</sup> )···Cl(1)    | 0.97    | 2.87      | 3.768(9)  | 154.6      |
| C(14B <sup>b</sup> )-H(14B <sup>b</sup> )···Cl(1)#2 | 0.93    | 2.75      | 3.593(13) | 151        |

|                                                     |      |      |           |       |
|-----------------------------------------------------|------|------|-----------|-------|
| C(16B <sup>b</sup> )-H(16B <sup>b</sup> )...Cl(2)#4 | 0.93 | 2.99 | 3.572(14) | 121.8 |
| C(17B <sup>b</sup> )-H(17B <sup>b</sup> )...Cl(2)#4 | 0.93 | 2.86 | 3.50(3)   | 126.9 |
| C(18B <sup>b</sup> )-H(18C <sup>b</sup> )...Cl(1)   | 0.97 | 2.53 | 3.488(17) | 168.7 |
| C(18B <sup>b</sup> )-H(18D <sup>b</sup> )...Cl(4)#5 | 0.97 | 2.52 | 3.485(18) | 178.9 |

Symmetry transformations used to generate equivalent atoms: #1  $x, -y+1/2, z+1/2$ ; #2  $x, -y+1/2, z-1/2$ ; #3  $-x+1, y-1/2, -z+1/2$ ; #4  $-x+1, -y, -z+1$ ; #5  $x+1, y, z$ .

**Table S5.** Hydrogen bonding data for **2** at 100 K.

| D-H...A                | D-H (Å) | H...A (Å) | D...A (Å) | <(DHA) (°) |
|------------------------|---------|-----------|-----------|------------|
| C(1)-H(1)...Cl(5)#1    | 0.95    | 2.82      | 3.518(15) | 130.6      |
| C(2)-H(2)...Cl(5)#1    | 0.95    | 2.98      | 3.586(18) | 122.9      |
| C(10)-H(10)...Cl(3)    | 0.95    | 2.81      | 3.502(16) | 130.5      |
| C(10)-H(10)...Cl(8)#2  | 0.95    | 2.94      | 3.623(14) | 130        |
| C(13)-H(13)...Cl(4)#3  | 0.95    | 2.76      | 3.500(13) | 135.5      |
| C(13)-H(13)...Cl(7)    | 0.95    | 2.9       | 3.580(16) | 129.9      |
| C(22)-H(22)...Cl(1)#4  | 0.95    | 2.85      | 3.574(14) | 134        |
| C(25)-H(25A)...Cl(3)#5 | 0.99    | 2.89      | 3.806(17) | 154.2      |
| C(25)-H(25B)...Cl(7)#1 | 0.99    | 2.71      | 3.673(16) | 164.3      |
| C(29)-H(29B)...Cl(6)#6 | 0.99    | 2.92      | 3.544(16) | 122.3      |
| C(30)-H(30B)...Cl(1)   | 0.98    | 2.82      | 3.762(16) | 161.1      |
| C(30)-H(30C)...Cl(5)#1 | 0.98    | 2.9       | 3.830(17) | 157.7      |
| C(31)-H(31B)...Cl(3)#5 | 0.99    | 2.9       | 3.798(19) | 152        |
| C(35)-H(35A)...Cl(5)#6 | 0.99    | 2.87      | 3.784(13) | 153.6      |
| C(38)-H(38A)...Cl(1)   | 0.99    | 2.99      | 3.665(14) | 126.4      |
| C(38)-H(38B)...Cl(8)#2 | 0.99    | 2.99      | 3.865(15) | 148.1      |
| C(40)-H(40B)...Cl(5)#6 | 0.98    | 2.74      | 3.679(18) | 159.6      |
| C(41)-H(41A)...Cl(8)#2 | 0.99    | 2.93      | 3.910(16) | 168.8      |
| C(41)-H(41B)...Cl(7)#2 | 0.99    | 2.81      | 3.499(15) | 127.5      |
| C(42)-H(42A)...Cl(3)   | 0.99    | 2.9       | 3.654(14) | 133.3      |
| O(1W)-H(1B)...Cl(2)    | 0.82    | 2.51      | 3.26(2)   | 152.8      |
| O(1W)-H(1A)...Cl(7)#7  | 0.82    | 2.7       | 3.33(2)   | 134.8      |

Symmetry transformations used to generate equivalent atoms: #1  $-x+1, y+1/2, -z$ ; #2  $-x, y+1/2, -z+1$ ; #3  $-x, y-1/2, -z$ ; #4  $-x+1, y-1/2, -z+1$ ; #5  $x+1, y, z$ ; #6  $-x+1, y+1/2, -z+1$ ; #7  $-x, y+1/2, -z$ .

**Table S6.** The  $\pi \cdots \pi$  interaction data for **1** at 100 K.

| Cg(I)...Cg(J) | ARU(J)    | Cg...Cg(Å) | $\alpha$ (°) | $\beta$ (°) | $\gamma$ (°) |
|---------------|-----------|------------|--------------|-------------|--------------|
| Cg(2)→Cg(2)   | [3566.01] | 3.669(3)   | 0.0(2)       | 22.4        | 22.4         |
| Cg(2)→Cg(4)   | [3566.01] | 3.798(3)   | 1.2(2)       | 27.6        | 26.7         |
| Cg(3)→Cg(5)   | [2655.02] | 3.750(5)   | 9.1(5)       | 21.1        | 29.8         |
| Cg(3)→Cg(6)   | [2655.03] | 3.603(14)  | 5            | 19.6        | 23.8         |
| Cg(4)→Cg(2)   | [3566.01] | 3.799(3)   | 1.2(2)       | 26.7        | 27.6         |
| Cg(4)→Cg(6)   | [2655.03] | 3.963(14)  | 4            | 30.9        | 29.8         |

|             |           |           |        |      |      |
|-------------|-----------|-----------|--------|------|------|
| Cg(5)→Cg(3) | [2645.01] | 3.750(5)  | 9.1(5) | 29.8 | 21.1 |
| Cg(6)→Cg(3) | [2645.01] | 3.604(14) | 5      | 23.8 | 19.6 |
| Cg(6)→Cg(4) | [2645.01] | 3.963(14) | 4      | 29.8 | 30.9 |

$[3566] = -X, 1-Y, 1-Z$ ;  $[2655] = 1-X, 1/2+Y, 1/2-Z$ ;  $[2655] = 1-X, 1/2+Y, 1/2-Z$ ;  $[2645] = 1-X, -1/2+Y, 1/2-Z$ ;  
 Cg(2): N(1)→C(1)→C(2)→C(3)→C(4)→C(5)  
 Cg(3): N(2)→C(11)→C(7)→C(8)→C(9)→C(10)  
 Cg(4): C(4)→C(5)→C(6)→C(7)→C(11)→C(12)  
 Cg(5): N(3A)→C(13A)→C(14A)→C(15A)→C(16A)→C(17A)  
 Cg(6): N(3B)→C(13B)→C(14B)→C(15B)→C(16B)→C(17B)

**Table S7.** The anion... $\pi$  interaction data for **1** at 100 K.

| Y-X(I)→Cg(J)      | ARU(J)    | X...Cg(Å) | $\gamma(^{\circ})$ |
|-------------------|-----------|-----------|--------------------|
| Bi(1)-Cl(3)→Cg(5) | [1555.02] | 3.548(5)  | 23.71              |
| Bi(1)-Cl(3)→Cg(6) | [1555.03] | 3.727(15) | 19.76              |

$[1555] = X, Y, Z$

**Table S8.** The C-H... $\pi$  interaction data for **2** at 100 K.

| C-H(I)→Cg(J)     | ARU(J)    | X...Cg(Å) | $\gamma(^{\circ})$ |
|------------------|-----------|-----------|--------------------|
| C(2)-H(2)→Cg6    | [2655.02] | 2.93      | 14.51              |
| C(21)-H(21)→Cg4  | [2646.01] | 2.88      | 16.45              |
| C(26)-H(26A)→Cg4 | [2655.01] | 2.64      | 10.91              |
| C(44)-H(44A)→Cg6 | [1565.02] | 2.9       | 13.21              |

$[2655] = 1-X, 1/2+Y, -Z$ ;  $[2646] = 1-X, -1/2+Y, 1-Z$ ;  $[1565] = X, 1+Y, Z$ ;

Cg(4): C(4)→C(5)→C(6)→C(7)→C(11)→C(12)

Cg(6): N(3)→C(13)→C(14)→C(15)→C(16)→C(24)

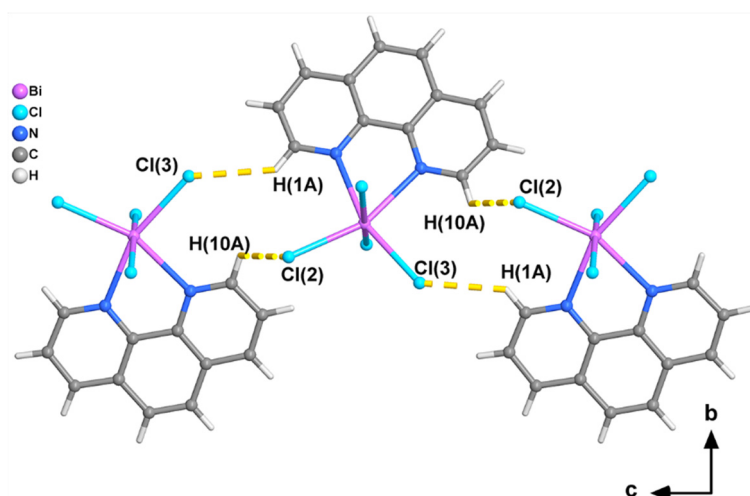

**Figure S3.** A diagram showing the hydrogen bonds (yellow dotted lines) among anionic units for **1** at 100 K.

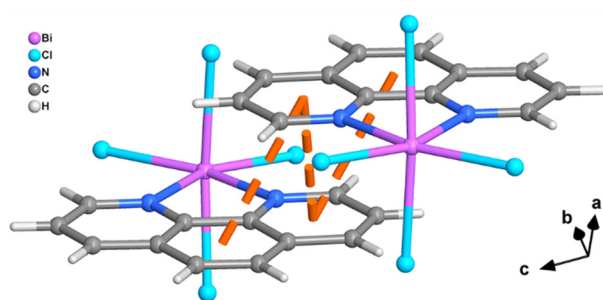

**Figure S4.** A diagram showing the  $\pi\cdots\pi$  interactions (orange dotted lines) among anionic units for **1** at 100 K.

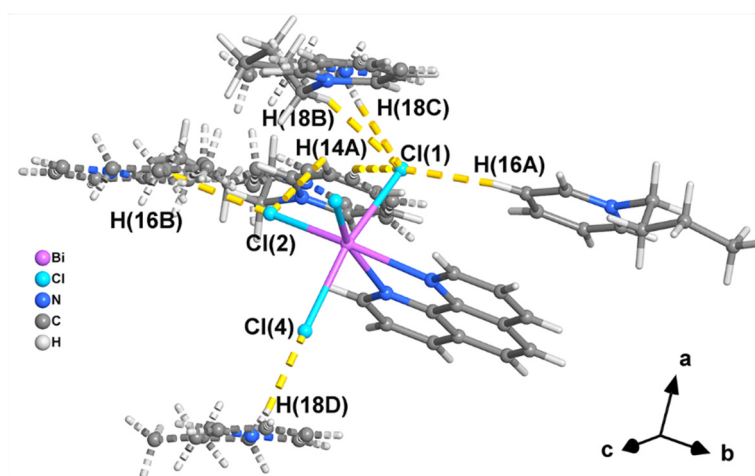

**Figure S5.** A diagram showing the hydrogen bonds (yellow dotted lines) between the anionic and cationic units for **1** at 100 K.

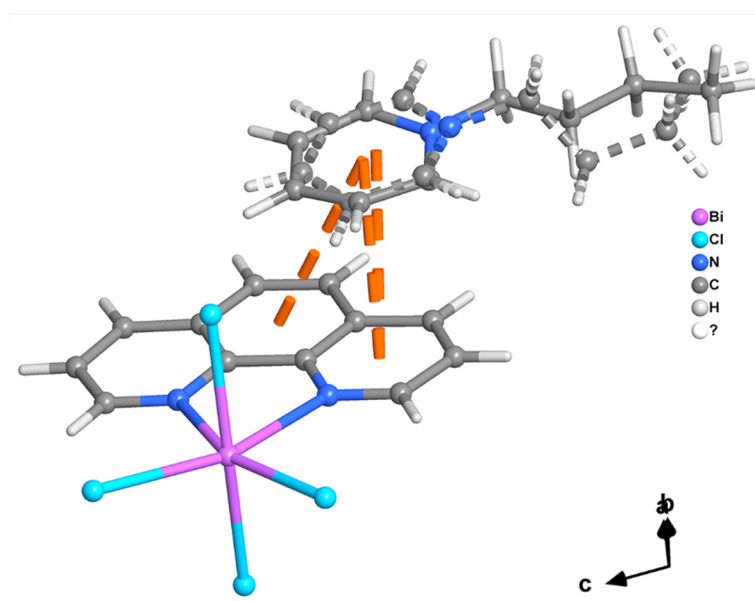

**Figure S6.** A diagram showing the  $\pi\cdots\pi$  interactions (orange dotted lines) between the anionic and cationic units for **1** at 100 K.

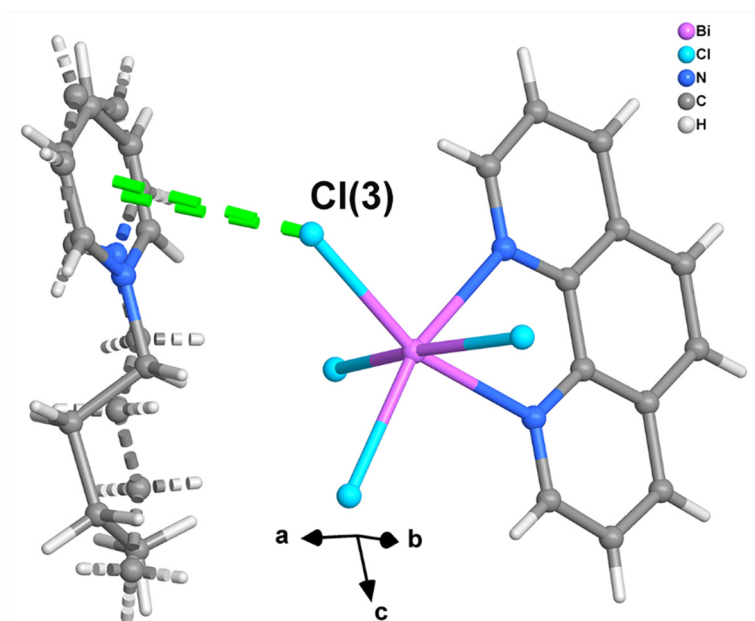

**Figure S7.** A diagram showing the anion... $\pi$  interactions (green dotted lines) between the anionic and cationic units for **1** at 100 K.

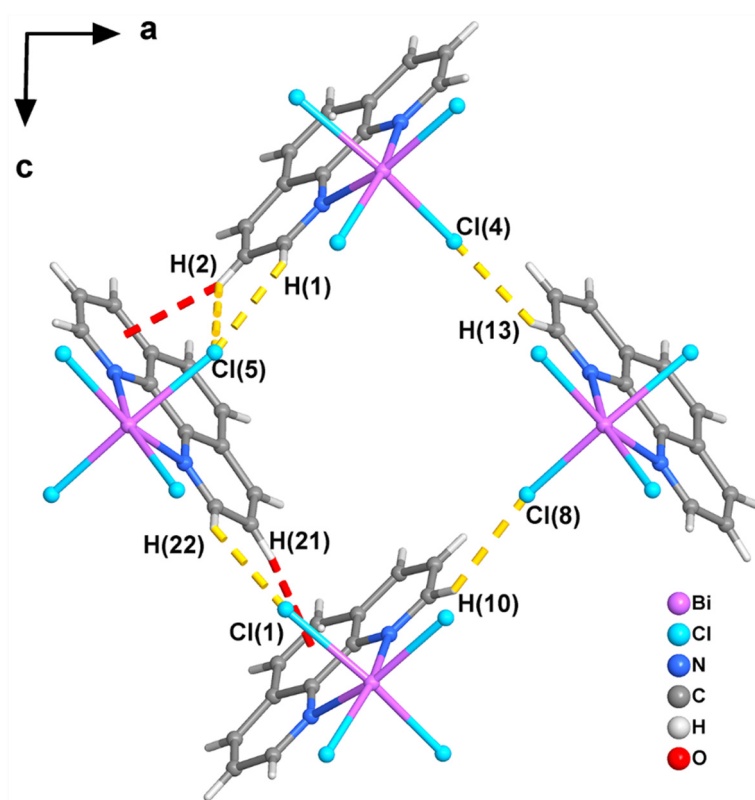

**Figure S8.** A diagram showing the hydrogen bonds (yellow dotted lines) and C-H... $\pi$  interactions (red dotted lines) among anionic units for **2** at 100 K.



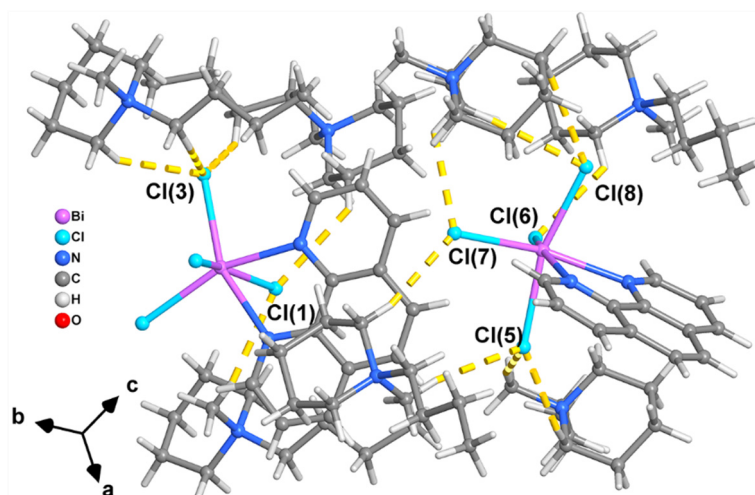

**Figure S9.** A diagram showing the hydrogen bonds (yellow dotted lines) between the anionic and cationic units for **2** at 100 K.

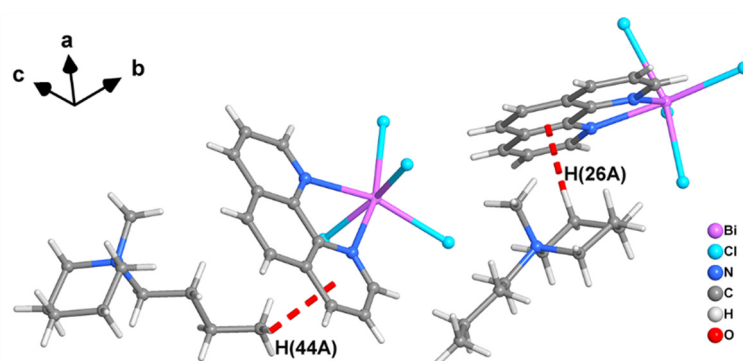

**Figure S10.** A diagram showing the C-H... $\pi$  interactions (red dotted lines) between the anionic and cationic units for **2** at 100 K.

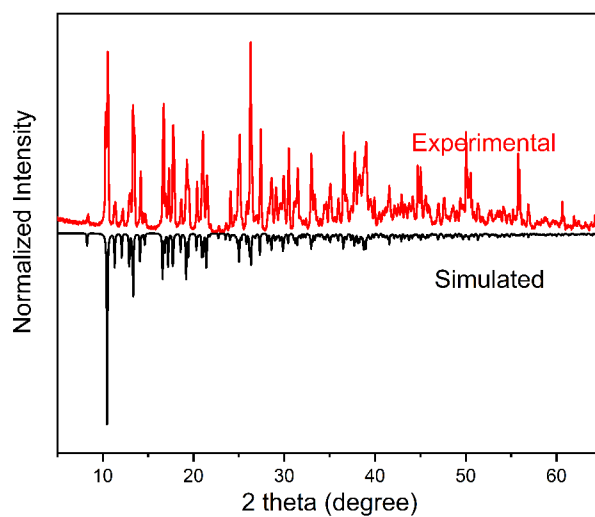

**Figure S11.** The simulated and experimental PXRD patterns of **1**.

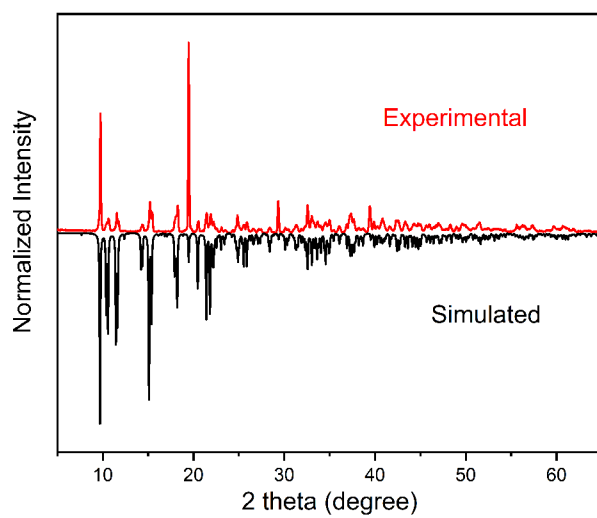

**Figure S12.** The simulated and experimental PXRD patterns of **2**.

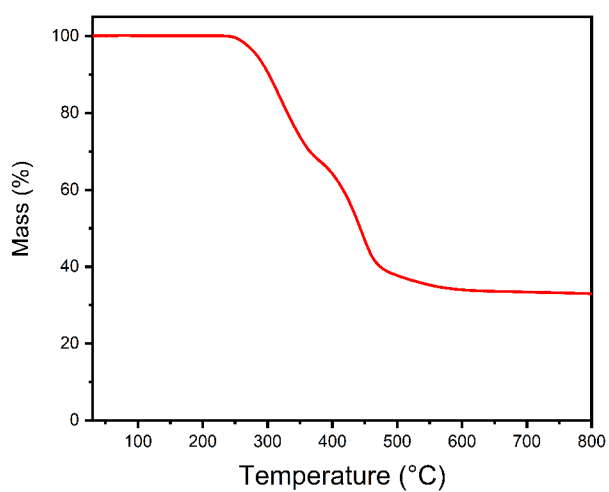

**Figure S13.** The thermogravimetric curve for **1**.

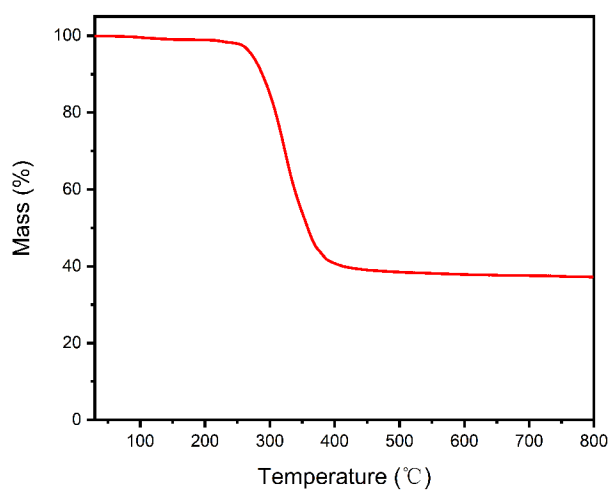

**Figure S14.** The thermogravimetric curve for **2**.

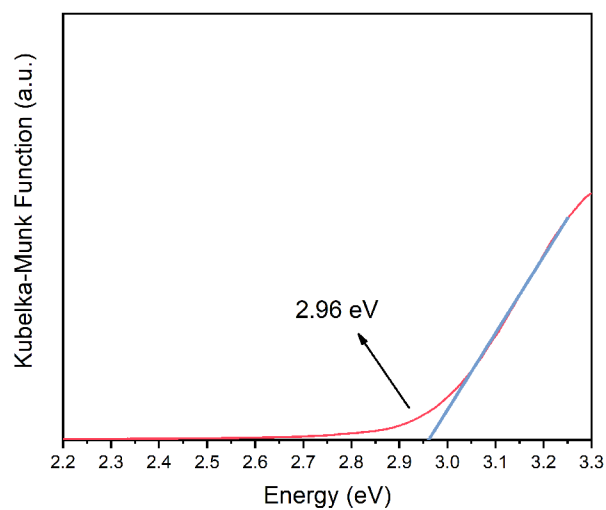

**Figure S15.** The solid-state optical absorption spectrum of **1**.

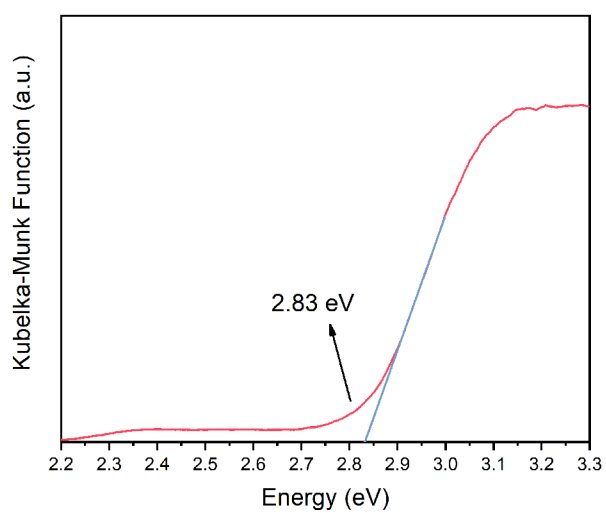

**Figure S16.** The solid-state optical absorption spectrum of **2**.

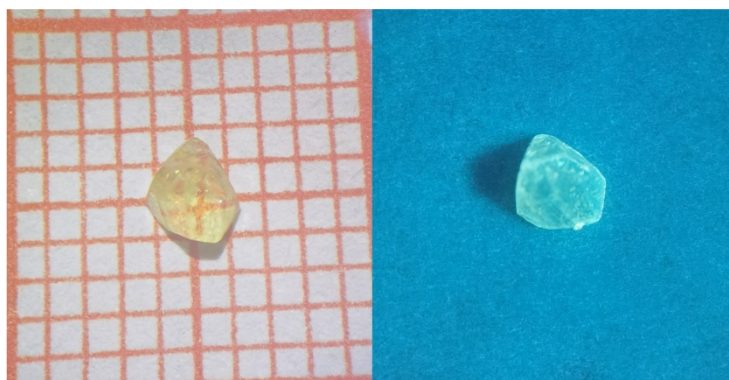

**Figure S17.** The photographs of **1** under natural (left) and UV light (right).

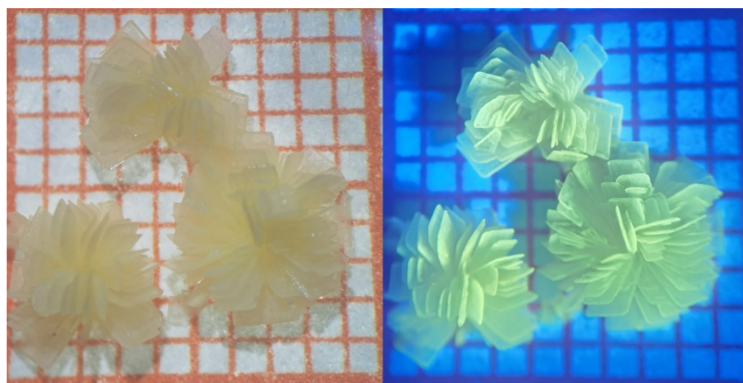

**Figure S18.** The photographs of **2** under natural (left) and UV light (right).

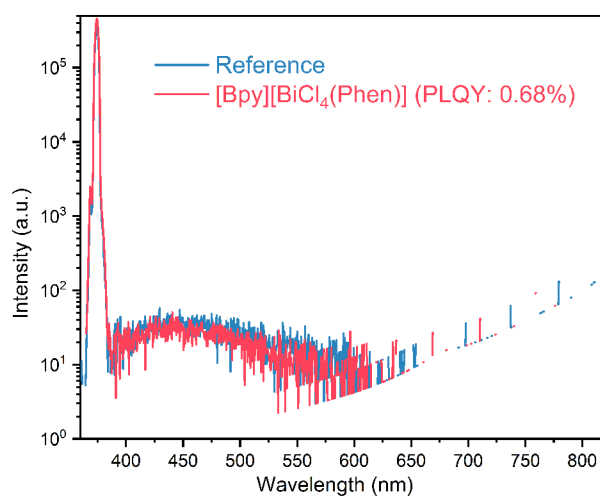

**Figure S19.** The photoluminescent spectra for calculating PLQY of **1**.

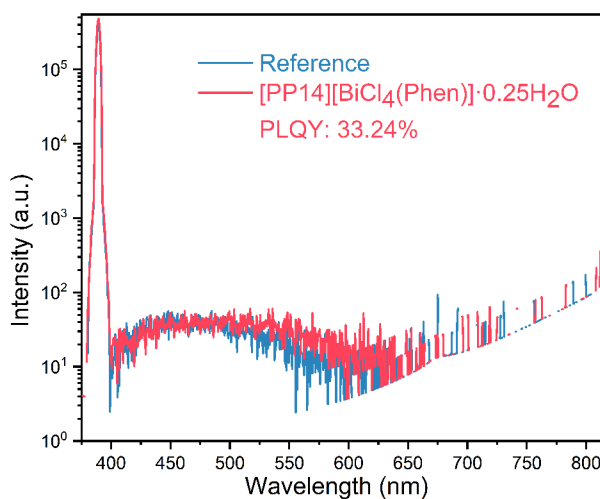

**Figure S20.** The photoluminescent spectra for calculating PLQY of **2**.
